# Supplementary material for: Intra-patient and inter-patient comparisons of DNA damage response biomarkers in Nasopharynx Cancer (NPC): analysis of NCC0901 randomised controlled trial of induction chemotherapy in locally advanced NPC
Source: BMC Cancer. 2018 Nov 12;18:1095. doi: 10.1186/s12885-018-5005-2 (PMC6233280; doi:10.1186/s12885-018-5005-2)
Supplement: Supplementary file 1 — Supplementary Methods. Selection of “best cases and controls” for subset analysis correlating assay readouts with severe late xerostomia. Table S1. Intraclass correlation coefficient (ICC) for additional sensitivity analysis of FLICA measurements. The single measurement and average of 3 measurements columns reports the ICC when either one or three tests were performed, respectively. Table S2. Summary of inter-patient heterogeneity in apoptotic and DNA damage responses. Table S3. Clinical and dosimetric characteristics of the 17 patients included in the sub-group exploratory analysis correlating assay readouts with severe late xerostomia using a “best case-control” design. Figure S1. Gating of (A) general lymphocyte population and (B) CD4+ or CD8+ lymphocyte sub-populations for FLICA apoptosis analysis by flow cytometry. Figure S2. Bland-Altman plots for (A) FLICA assay, and (B) γH2AX for the general lymphocyte population, as well as plots for FLICA assays of the (C) CD4+ and (D) CD8+ T lymphocyte subset populations. From Bland-Altman plots, outliers were identified and excluded from subsequent sensitivity analyses. Figure S3. Correlation between background %FLICA and %FLICA post-8 Gy for the (A) CD4 and (B) CD8 T-lymphocyte subsets. Solid lines were generated by linear regression; R values were generated by Spearman correlation test. Figure S4. Apoptotic responses post-8Gy in the CD4 and CD8 T-lymphocyte subsets were correlated for the same patient. Solid lines were generated by linear regression; R values were generated by Spearman correlation test. Figure S5. Sub-group exploratory analysis comparing residual γH2AX 4 Gy 24 h foci count between best cases (N = 9) and controls (N = 8). (PDF 5363 kb) [file 12885_2018_5005_MOESM1_ESM.pdf]

## Additional files

Chua KLM, Yeo ELL, Shihabudeen WA, et al. Intra-patient and inter-patient comparisons of DNA damage response biomarkers in Nasopharynx Cancer (NPC): analysis of NCC0901 randomised controlled trial of induction chemotherapy in locally advanced NPC.

### p 2. Supplementary Methods

- p 2. Selection of “best cases and controls” for subset analysis correlating assay readouts with severe late xerostomia.

### p 3. Supplementary Tables

- p 3. Table S1. Intraclass correlation coefficient (ICC) for additional sensitivity analysis of FLICA measurements. The single measurement and average of 3 measurements columns reports the ICC when either one or three tests were performed, respectively.
- p 4. Table S2. Summary of inter-patient heterogeneity in apoptotic and DNA damage responses.
- p 5. Table S3. Clinical and dosimetric characteristics of the 17 patients included in the sub-group exploratory analysis correlating assay readouts with severe late xerostomia using a “best case-control” design.

### p 6. Supplementary Figures

- p 6. Fig. S1. Gating of (A) general lymphocyte population and (B) CD4+ or CD8+ lymphocyte sub-populations for FLICA apoptosis analysis by flow cytometry.
- p 7. Fig. S2. Bland-Altman plots for (A) FLICA assay, and (B)  $\gamma$ H2AX for the general lymphocyte population, as well as plots for FLICA assays of the (C) CD4+ and (D) CD8+ T lymphocyte subset populations. From Bland-Altman plots, outliers were identified and excluded from subsequent sensitivity analyses.
- p 8. Fig. S3. Correlation between background %FLICA and %FLICA post-8 Gy for the (A) CD4 and (B) CD8 T-lymphocyte subsets. Solid lines were generated by linear regression; *R* values were generated by Spearman correlation test.
- p 9. Fig. S4. Apoptotic responses post-8Gy in the CD4 and CD8 T-lymphocyte subsets were correlated for the same patient. Solid lines were generated by linear regression; *R* values were generated by Spearman correlation test.
- p 10. Fig. S5. Sub-group exploratory analysis comparing residual  $\gamma$ H2AX 4 Gy 24 h foci count between best cases (N = 9) and controls (N = 8).

## Supplementary Methods

### **Selection of “best cases and controls” for subset analysis correlating assay readouts with severe late xerostomia**

Using late xerostomia as a clinical end-point, an exploratory analysis comparing molecular assay readouts between ‘best cases’ and ‘controls’ was performed. We adopted a “best case-control” design in order to detect the largest magnitude of difference in assay readouts that can be attributed to the host’s intrinsic radiosensitivity. ‘Best case’ patients experienced marked ( $\geq G2$ ) late adverse effects despite similar disease and dosimetric parameters, while ‘control’ patients were spared from any late toxicity. Details of treatment and late xerostomia grading can be found in the 2015 preliminary analysis of NCC0901[Ref 22 in main text]. Cases and controls were selected by consensus agreement of independent blinded assessments by two expert radiation oncologists (MC and KC). Cellular indices between these two distinct groups were then compared using Mann-whitney U test.

## Supplementary Tables

|           | Sensitivity Analysis |                     |                              |
|-----------|----------------------|---------------------|------------------------------|
|           | ICC (95% CI)         |                     |                              |
|           | N                    | Single measurement  | Average of<br>3 measurements |
| FLICA 0Gy | 39                   | 0.25 (0.043, 0.467) | 0.50 (0.118, 0.725)          |
| FLICA 8Gy | 39                   | 0.28 (0.092, 0.484) | 0.54 (0.233, 0.738)          |

**Table S1.** Intraclass correlation coefficient (ICC) for additional sensitivity analysis of FLICA measurements. The single measurement and average of 3 measurements columns reports the ICC when either one or three tests were performed, respectively.

**Table S2.** Summary of inter-patient heterogeneity in apoptotic and DNA damage responses

| N=85                                | Median (IQR)        | Mean (SD)    | Range         |
|-------------------------------------|---------------------|--------------|---------------|
| %FLICA                              |                     |              |               |
| Non-IRR <sup>[1]</sup>              | 33.0 (23.37, 46.57) | 35.9 (15.76) | 6.05 - 84.10  |
| Post-IRR                            | 76.7 (65.70, 82.50) | 74.6 (11.34) | 46.80 - 97.25 |
| Background corrected                | 39.8 (33.47, 44.95) | 38.7 (9.44)  | 13.15 - 61.35 |
| %FLICA CD4 <sup>+</sup>             |                     |              |               |
| Non-IRR <sup>[1]</sup>              | 40.8 (30.75, 56.70) | 43.9 (17.02) | 18.85 - 93.30 |
| Post-IRR                            | 73.0 (62.20, 84.00) | 72.5 (14.69) | 38.55 - 99.40 |
| Background corrected                | 28.0 (21.15, 34.70) | 28.6 (9.68)  | 6.10 - 50.90  |
| %FLICA CD8 <sup>+</sup>             |                     |              |               |
| Non-IRR <sup>[1]</sup>              | 37.6 (26.10, 55.70) | 41.4 (19.71) | 7.50 - 97.40  |
| Post-IRR <sup>[1]</sup>             | 81.4 (71.45, 89.80) | 80.2 (12.59) | 46.35 - 99.60 |
| Background corrected                | 36.8 (30.50, 48.90) | 38.8 (12.96) | 2.20 - 71.20  |
| γH2AX foci 1Gy30min                 |                     |              |               |
| Non-IRR                             | 0.6 (0.46, 0.72)    | 0.6 (0.17)   | 0.18 - 0.94   |
| Post-IRR <sup>[1]</sup>             | 12.2 (11.52, 13.66) | 12.5 (2.20)  | 7.71 - 23.36  |
| Background corrected <sup>[1]</sup> | 11.5 (11.04, 12.89) | 12.0 (2.23)  | 6.97 - 23.04  |
| γH2AX foci 4Gy24h                   |                     |              |               |
| Non-IRR                             | 0.5 (0.40, 0.68)    | 0.5 (0.22)   | 0.13 - 0.96   |
| Post-IRR <sup>[1]</sup>             | 6.8 (5.82, 7.61)    | 6.8 (1.81)   | 1.00 - 12.78  |
| Background corrected <sup>[1]</sup> | 6.2 (5.23, 7.15)    | 6.3 (1.83)   | 0.56 - 12.24  |

[1] Data not normally distributed

**Table S3.** Clinical and dosimetric characteristics of the 17 patients included in the sub-group exploratory analysis correlating assay readouts with severe late xerostomia using a “best case-control” design.

| Clinical and Dosimetric Parameters                       | Case (N = 9)       | Control (N = 8)    |
|----------------------------------------------------------|--------------------|--------------------|
| <b>Age at diagnosis</b>                                  |                    |                    |
| mean (SD)                                                | 48.4 (7.4)         | 47.6 (10.6)        |
| median (IQR)                                             | 48 (41.0 - 53.0)   | 49 (39.5 - 55.8)   |
| <b>Gender</b>                                            |                    |                    |
| Female                                                   | 1 (11.1)           | 2 (25)             |
| Male                                                     | 8 (88.9)           | 6 (75)             |
| <b>Ethnic Group</b>                                      |                    |                    |
| Chinese                                                  | 9 (100.0)          | 8 (100.0)          |
| <b>UICC (1997) T stage</b>                               |                    |                    |
| T1-2                                                     | 5 (55.6)           | 4 (50)             |
| T3-4                                                     | 4 (44.4)           | 4 (50)             |
| <b>UICC (1997) N stage</b>                               |                    |                    |
| N0-1                                                     | 1 (11.1)           | 0 (0.0)            |
| N2-3                                                     | 8 (88.9)           | 8 (100.0)          |
| <b>UICC (1997) overall stage</b>                         |                    |                    |
| III                                                      | 6 (66.7)           | 6 (75)             |
| IV                                                       | 3 (33.3)           | 2 (25)             |
| <b>Treatment</b>                                         |                    |                    |
| C-IMRT                                                   | 3 (33.3)           | 5 (62.5)           |
| IC + C-IMRT                                              | 6 (66.7)           | 3 (37.5)           |
| <b>Combined Parotid glands for D<sub>mean</sub> [Gy]</b> |                    |                    |
| mean (range)                                             | 36.4 (15.5 - 49.1) | 43.6 (36.4 - 60.9) |
| <b>Combined Parotid glands for D<sub>50</sub> [Gy]</b>   |                    |                    |
| mean (range)                                             | 30.4 (18.4 - 45.3) | 39.3 (27.4 - 60.8) |

Abbreviation: SD = standard deviation; IQR = interquartile range; UICC = Union for International Cancer Control; C-IMRT = Concurrent Chemotherapy and IMRT, Intensity Modulated Radiotherapy; IC+C-IMRT = Induction chemotherapy and concurrent chemo-IMRT, Gy = Gray (unit); D<sub>mean</sub> = mean dose; D<sub>50</sub> = median dose

## Supplementary Figures

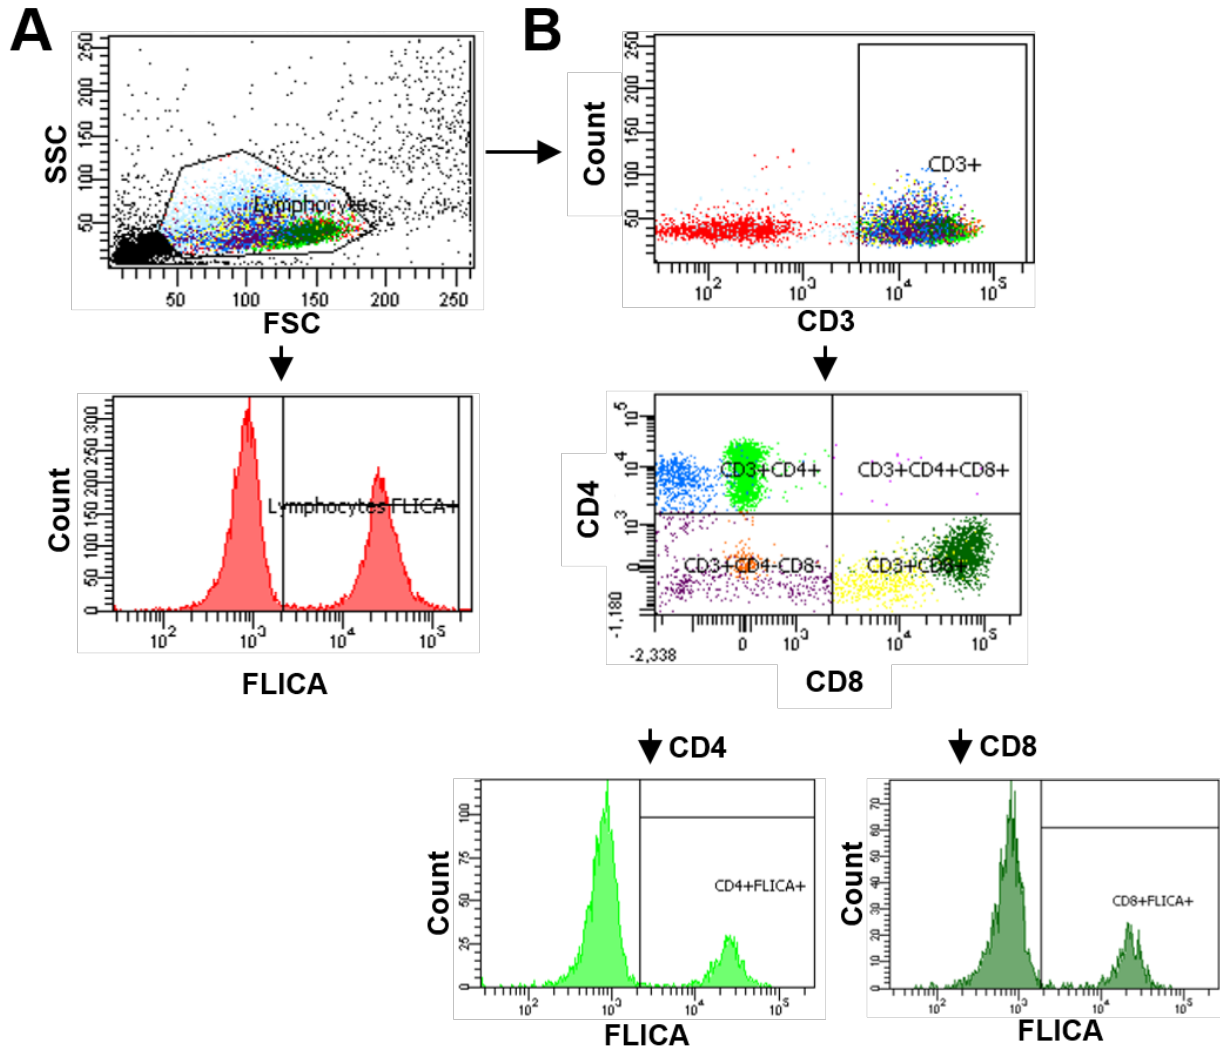

**Figure S1.** Gating of (A) general lymphocyte population and (B) CD4+ or CD8+ lymphocyte sub-populations for FLICA apoptosis analysis by flow cytometry.

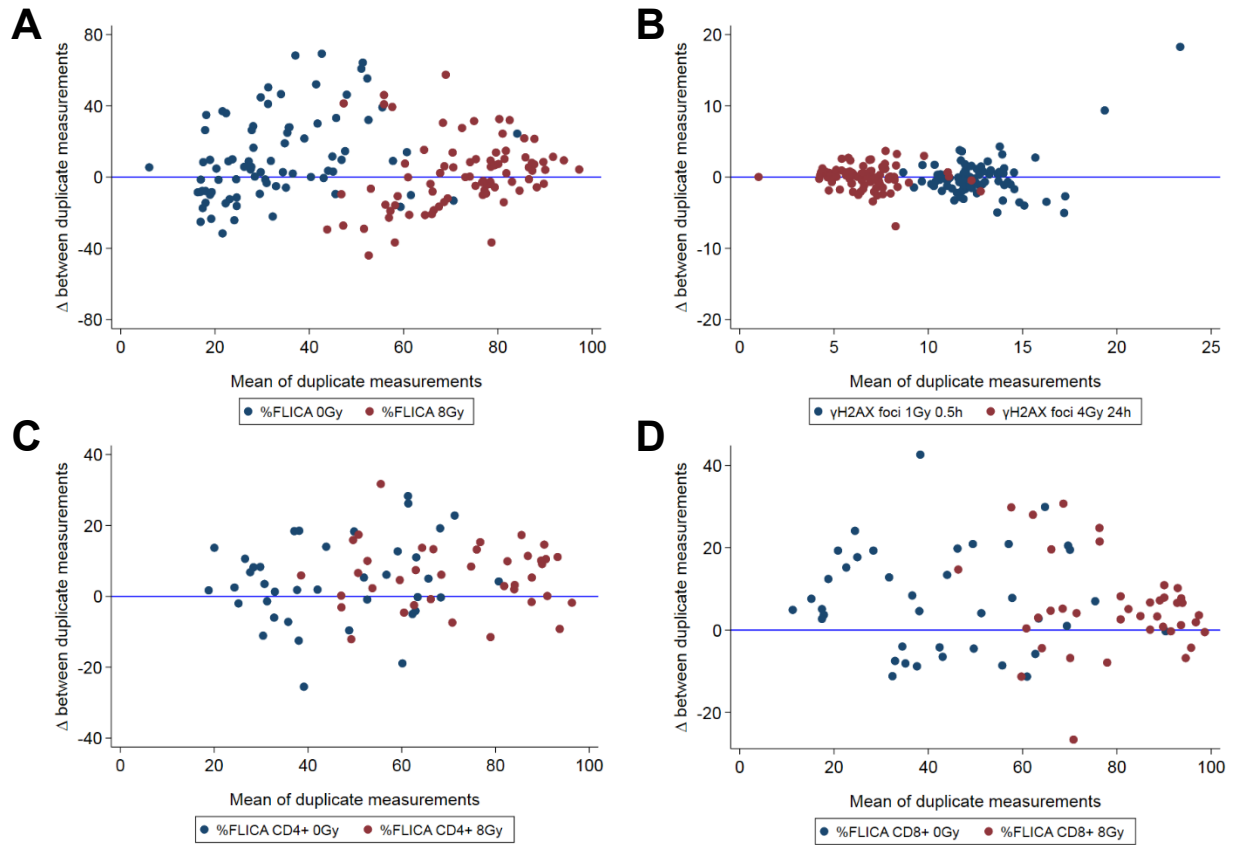

**Figure S2.** Bland-Altman plots for (A) FLICA assay, and (B)  $\gamma$ H2AX for the general lymphocyte population, as well as plots for FLICA assays of the (C) CD4+ and (D) CD8+ T lymphocyte subset populations. From Bland-Altman plots, outliers were identified and excluded from subsequent sensitivity analyses.

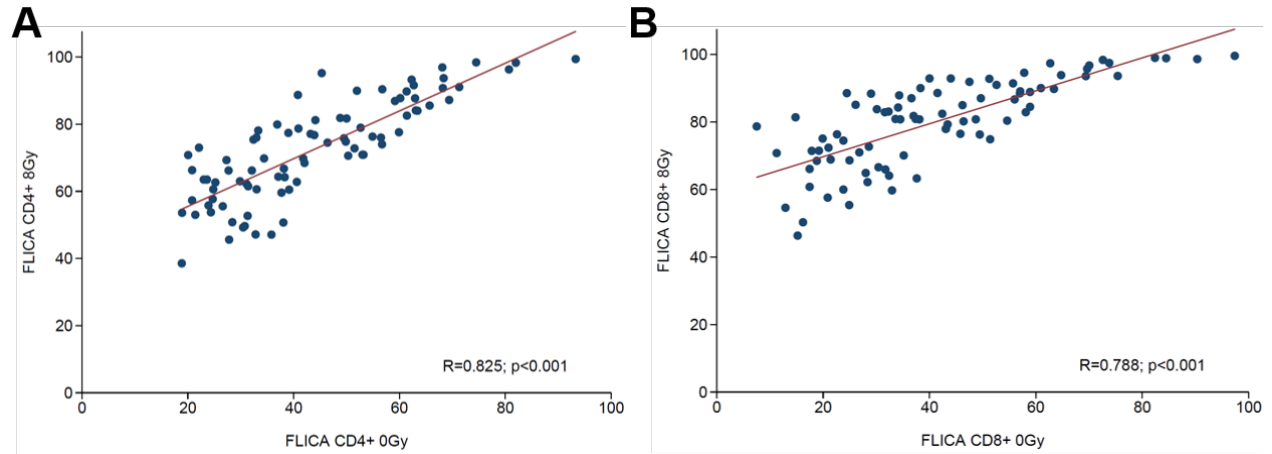

**Figure S3.** Correlation between background %FLICA and %FLICA post-8 Gy for the (A) CD4 and (B) CD8 T-lymphocyte subsets. Solid lines were generated by linear regression;  $R$  values were generated by Spearman correlation test.

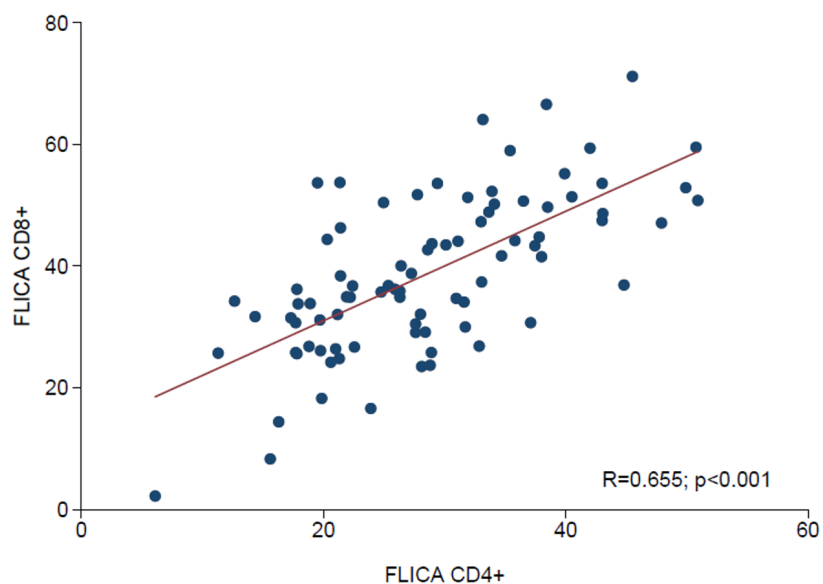

**Figure S4.** Apoptotic responses post-8Gy in the CD4 and CD8 T-lymphocyte subsets were correlated for the same patient. Solid lines were generated by linear regression;  $R$  values were generated by Spearman correlation test.

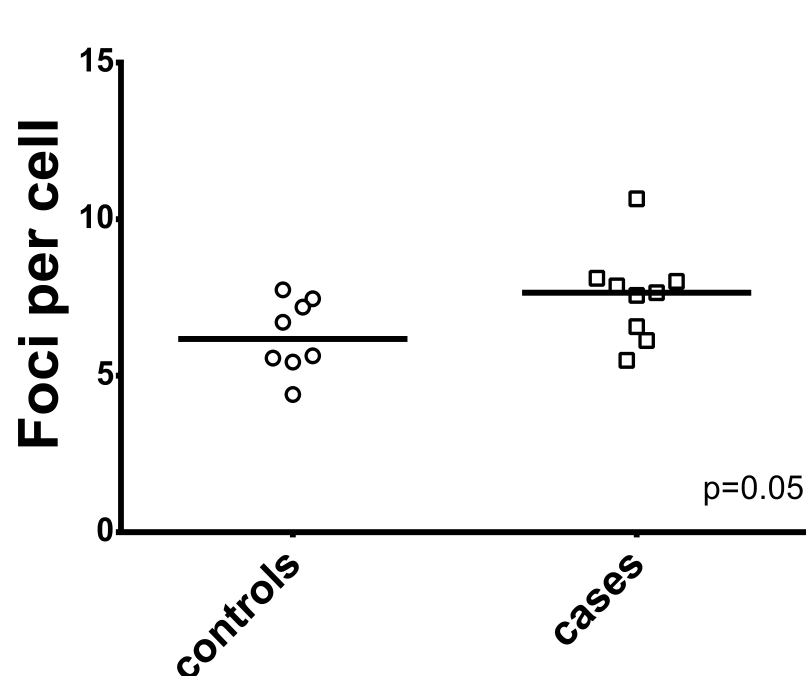

**Figure S5.** Sub-group exploratory analysis comparing residual  $\gamma$ H2AX 4 Gy 24 h foci count between best cases (N = 9) and controls (N = 8).
